# Supplementary material for: Phytochemical Composition and Bioactive Potential of Melissa officinalis L., Salvia officinalis L. and Mentha spicata L. Extracts
Source: MDPI journal article supplement (doi:10.3390/foods12050947), 2023-02-23
Supplement: s1 [file s1]

**Table S1.** Limit of detection (LOD), limit of quantification (LOQ) and coefficient of linear correlation ( $R^2$ ) of the different standards used to obtain the calibration curves required for phenolic compound quantification

| Compound Standard      | LOD ( $\mu\text{g/mL}$ ) | LOQ ( $\mu\text{g/mL}$ ) | $R^2$  |
|------------------------|--------------------------|--------------------------|--------|
| 4-Hydroxybenzoic acid  | 0.17                     | 1.22                     | 0.999  |
| Apigenin-6-C-glucoside | 0.19                     | 0.63                     | 0.9989 |
| Apigenin-7-O-glucoside | 0.10                     | 0.53                     | 0.999  |
| Caffeic acid           | 0.78                     | 1.97                     | 0.994  |
| Chlorogenic acid       | 0.20                     | 0.68                     | 0.9999 |
| Naringenin             | 0.20                     | 0.64                     | 0.9998 |
| Rosmarinic acid        | 0.15                     | 0.68                     | 0.999  |

**Table S2.** Phenolic compound content (mg/g dry extract) of sage (*Salvia officinalis* L.) extracts

| Peak | Rt    | $\lambda_{\text{max}}$ | [M-H] $m/z$ | MS <sup>2</sup>                                 | Tentative Identification                                        | Decoction  | Infusion    | Hydroethanolic |
|------|-------|------------------------|-------------|-------------------------------------------------|-----------------------------------------------------------------|------------|-------------|----------------|
| 1    | 4.87  | 267sh319               | 311         | 179(60),149(100),135(9)                         | Caftaric acid <sup>1</sup>                                      | 0.24±0.01  | 0.27±0.01   | 0.264±0.001    |
| 2    | 5.15  | 325                    | 503         | 341(17),281(15),221(8),179(34),161(38),135(5)   | 6-O-Caffeoyl-fructosyl-glucoside <sup>4</sup>                   | 0.28±0.02  | 0.27±0.02   | 0.23±0.01      |
| 3    | 5.74  | 328                    | 341         | 179(100)                                        | Caffeic acid hexoside <sup>4</sup>                              | 0.15±0.01  | 0.141±0.004 | 0.115±0.002    |
| 4    | 7.30  | 325                    | 387         | 369(26), 207(100), 163(47)                      | Caffeic acid acetylhexoside <sup>4</sup>                        | 0.11±0.01  | 0.096±0.004 | 0.119±0.005    |
| 5    | 7.77  | 282sh323               | 377         | 207(100),191(5),163(38),137(7)                  | 3- <i>p</i> -Coumarouylquinic acid <sup>5</sup>                 | 0.1±0.01   | 0.1±0.002   | 0.088±0.002    |
| 6    | 8.8   | 337                    | 593         | 473(18), 383(6), 353(12)                        | Apigenin-6,8-di-C-hexoside <sup>2</sup>                         | 1.23±0.09  | 1.42±0.08   | 0.89±0.02      |
| 7    | 10.96 | 323                    | 537         | 519(84),341(10),179(32),161(48),135(10)         | Salvianolic acid I <sup>7</sup>                                 | 0.7±0.02   | 0.67±0.03   | 0.55±0.01      |
| 8    | 13.14 | 325                    | 637         | 285(100)                                        | Luteolin- <i>O</i> -di-glucuronide <sup>3</sup>                 | 1.1±0.07   | 1.33±0.08   | 1.05±0.05      |
| 9    | 14.87 | 341                    | 477         | 301(100)                                        | 6-Hydroxyluteolin-7- <i>O</i> -glucuronide <sup>7</sup>         | 3.54±0.25  | 3.63±0.17   | 3.05±0.03      |
| 10   | 15.93 | 327                    | 597         | 359(30),295(26),197(16),179(15),135(8)          | Yunnaneic acid F <sup>7</sup>                                   | 0.93±0.02  | 0.87±0.07   | 0.66±0.01      |
| 11   | 17.18 | 341                    | 593         | 473(21), 383(9), 353(16)                        | Apigenin 6- <i>C</i> -glucose-8- <i>C</i> -glucose <sup>7</sup> | 1±0.03     | 1.47±0.01   | 0.837±0        |
| 12   | 17.81 | 345                    | 461         | 285(100)                                        | Luteolin-7- <i>O</i> -glucuronide <sup>3</sup>                  | 18.07±0.71 | 15.7±0.98   | 12.06±0.41     |
| 13   | 19.41 | 337                    | 717         | 537(78),519(100),493(53),339(27),321(45)295(62) | Salvianolic acid B <sup>7</sup>                                 | 1.66±0.04  | 2.88±0.11   | 2.08±0.02      |
| 14   | 20.66 | 336                    | 359         | 359(47),197(73),179(71),161(100)                | <i>cis</i> -Rosmarinic acid <sup>7</sup>                        | 28.4±1.25  | 24.72±1.29  | 22.72±0.71     |
| 15   | 21.22 | 289sh326               | 555         | 493(100),359(16),225(5)                         | Salvianolic acid K isomer I <sup>7</sup>                        | 4.46±0.13  | 3.64±0.15   | 3.34±0.09      |
| 16   | 22.09 | 329                    | 555         | 493(100),359(16),225(5)                         | Salvianolic acid K isomer II <sup>7</sup>                       | 2.98±0.12  | 3.34±0.24   | 2.31±0.08      |
| 17   | 22.64 | 334                    | 447         | 285(100)                                        | Luteolin- <i>O</i> -hexoside isomer I <sup>3</sup>              | 6.2±0.1    | 5.33±0.34   | 3.48±0.1       |
| 18   | 23.36 | 332                    | 359         | 359(45),197(69),179(75),161(100)                | <i>trans</i> -Rosmarinic acid <sup>7</sup>                      | 1.5±0.08   | 2.05±0.12   | 1.39±0.05      |
| 19   | 24.26 | 330                    | 555         | 493(100),359(26),225(7)                         | Salvianolic acid K isomer <sup>7</sup>                          | 1.71±0.02  | 1.66±0.02   | 1.36±0.05      |

**Table S2 (cont.).** Phenolic compound content (mg/g dry extract) of sage (*Salvia officinalis* L.) extracts

| Peak                     | Rt    | $\lambda_{\max}$ | [M-H] $m/z$ | MS <sup>2</sup>                                         | Tentative Identification                        | Decoction  | Infusion    | Hydroethanolic |
|--------------------------|-------|------------------|-------------|---------------------------------------------------------|-------------------------------------------------|------------|-------------|----------------|
| 20                       | 25.77 | 336              | 503         | 285(100)                                                | Luteolin-acetyl-O-glucuronide <sup>3</sup>      | 3.52±0.08  | 3.07±0.07   | 2.55±0.2       |
| 21                       | 27.22 | 328              | 537         | 493(100),359(43),313(8),295(5)                          | Lithospermic acid A <sup>7</sup>                | 3.32±0.12  | 2.69±0.11   | 1.99±0.02      |
| 22                       | 27.9  | 327              | 563         | 545(27),503(40),473(100),443(83),383(90),353(85)        | Apigenin 6-C-pentosyl-8-C-hexoside <sup>2</sup> | 1.14±0.01  | 0.881±0.001 | 0.73±0.04      |
| 23                       | 30.86 | 337              | 447         | 285(100)                                                | Luteolin-O-hexoside isomer II <sup>3</sup>      | 1.16±0.02  | 0.9±0.01    | 0.87±0.05      |
| 24                       | 32.87 | 283sh323         | 717         | 537(25),519(44),493(18),339(24),321(25),313(9),295(100) | Salvianolic acid E <sup>7</sup>                 | 0.58±0.04  | 0.54±0.01   | 0.44±0.01      |
| Total Phenolic Acids     |       |                  |             |                                                         |                                                 | 47.12±1.38 | 43.93±0.61  | 37.64±0.77     |
| Total Flavonoids         |       |                  |             |                                                         |                                                 | 36.95±1.18 | 33.74±1.71  | 25.53±0.24     |
| Total Phenolic Compounds |       |                  |             |                                                         |                                                 | 84.07±2.56 | 77.67±1.1   | 63.17±1.01     |

Rt: Retention time (min),  $\lambda_{\max}$ : wavelengths of maximum absorption in the visible region (nm); MS<sup>2</sup>: second stage of mass spectrometry. Superscript numbers indicate the compound standard used for the quantification: (1) 4-Hydroxybenzoic acid; (2) Apigenin-6-C-glucoside; (3) Apigenin-7-O-glucoside; (4) Caffeic acid; (5) Chlorogenic acid; (6) Naringenin; (7) Rosmarinic acid. Content values expressed as mean ± SD (n= 3).

**Table S3.** Phenolic compound content (mg/g dry extract) of lemon balm (*Melissa officinalis* L.) extracts

| Peak                            | Rt    | $\lambda_{\max}$ | [M-H] <i>m/z</i> | MS <sup>2</sup>                                             | Tentative Identification                                        | Decoction   | Infusion    | Hydroethanolic |
|---------------------------------|-------|------------------|------------------|-------------------------------------------------------------|-----------------------------------------------------------------|-------------|-------------|----------------|
| 1                               | 4.67  | 328              | 311              | 179(61),149(100),135(8)                                     | Caftaric acid <sup>1</sup>                                      | 0.22±0.01   | 0.39±0.01   | nd             |
| 2                               | 8.86  | 288sh324         | 179              | 135(100)                                                    | Caffeic acid <sup>4</sup>                                       | 0.102±0.004 | 0.037±0.002 | 0.366±0.005    |
| 3                               | 9.27  | 281sh325         | 539              | 495(63),359(21),295(45),279(4),197(34),179(16)              | Yunnaneic acid D <sup>7</sup>                                   | 0.32±0.01   | 0.31±0.01   | 0.15±0.01      |
| 4                               | 11.56 | 323              | 537              | 519(84),341(10),179(32),161(48),135(10)                     | Salvianolic acid I <sup>7</sup>                                 | 1.31±0.07   | 1.18±0.02   | 0.332±0.001    |
| 5                               | 15.53 | 284sh326         | 623              | 461(100), 285(85)                                           | Luteolin- <i>O</i> -hexosyl- <i>O</i> -glucuronide <sup>3</sup> | 0.62±0.04   | 0.59±0.01   | 0.611±0.003    |
| 6                               | 16.35 | 330              | 521              | 359(51), 197(21),179(37),161(100)                           | Rosmarinic acid hexoside <sup>7</sup>                           | 2.36±0.01   | 1.83±0.08   | 1.36±0.01      |
| 7                               | 16.9  | 278sh319         | 717              | 519(100), 339, 321                                          | Salvianolic acid A <sup>7</sup>                                 | 1.27±0.05   | 1.78±0.06   | 0.53±0.02      |
| 8                               | 18.59 | 283sh325         | 719              | 539(12),521(9), 359(100), 197(9), 179(12), 161(51),135(5)   | Sagerinic acid <sup>7</sup>                                     | 2.35±0.15   | 2.03±0.06   | 1.082±0.005    |
| 9                               | 19.91 | 330              | 439              | 359(10), 179(8),161(40),135(28)                             | Sulphated rosmarinic acid <sup>7</sup>                          | 1.37±0.07   | 0.95±0.07   | 0.67±0.03      |
| 10                              | 20.57 | 316sh331         | 359              | 197(81),179(90),161(100), 135(28)                           | Rosmarinic acid <sup>7</sup>                                    | 41.71±2     | 34.4±0.2    | 40.36±0.22     |
| 11                              | 24.3  | 326              | 537              | 493(100),359(35),313(4),295(2)                              | Lithospermic acid A <sup>7</sup>                                | 11.51±0.81  | 5.78±0.36   | 4.54±0.04      |
| 12                              | 27.17 | 328              | 537              | 493(100),359(32),313(4),295(5)                              | Lithospermic acid A isomer <sup>7</sup>                         | 16.09±0.06  | 9.44±0.51   | 6.04±0.41      |
| 13                              | 30.05 | 328              | 829              | 667(82), 535(100), 491(21),311(50), 293(5), 197(3), 179(11) | Salvianolic acid C derivative <sup>7</sup>                      | 3.76±0.1    | 1.51±0.04   | 1.43±0.03      |
| 14                              | 33.16 | 287sh324         | 717              | 537(25),519(44),493(18),339(24),321(25),313(9),295(100)     | Salvianolic acid E <sup>7</sup>                                 | 1.53±0.04   | 0.75±0.02   | 0.86±0.01      |
| <b>Total Phenolic Acids</b>     |       |                  |                  |                                                             |                                                                 | 83.9±1.74   | 60.41±1.41  | 57.74±0.31     |
| <b>Total Flavonoids</b>         |       |                  |                  |                                                             |                                                                 | 0.62±0.04   | 0.59±0.01   | 0.611±0.003    |
| <b>Total Phenolic Compounds</b> |       |                  |                  |                                                             |                                                                 | 84.51±1.77  | 61±1.42     | 58.35±0.31     |

Rt: Retention time (min),  $\lambda_{\max}$ : wavelengths of maximum absorption in the visible region (nm); MS<sup>2</sup>: second stage of mass spectrometry. Superscript numbers indicate the compound standard used for the quantification: (1) 4-Hydroxybenzoic acid; (2) Apigenin-6-*C*-glucoside; (3) Apigenin-7-*O*-glucoside; (4) Caffeic acid; (5) Chlorogenic acid; (6) Naringenin; (7) Rosmarinic acid. Content values expressed as mean ± SD (n= 3); nd: not detected.

**Table S4.** Phenolic compound content (mg/g dry extract) of spearmint (*Mentha spicata* L.) extracts

| Peak                            | Rt    | $\lambda_{\max}$ | [M-H] $m/z$ | MS <sup>2</sup>                                             | Tentative Identification                                        | Decoction   | Infusion    | Hydroethanolic |
|---------------------------------|-------|------------------|-------------|-------------------------------------------------------------|-----------------------------------------------------------------|-------------|-------------|----------------|
| 1                               | 3.95  | 281              | 191         | 173(100),111(23)                                            | Quinic acid <sup>1</sup>                                        | 0.61±0.01   | 0.222±0.003 | nd             |
| 2                               | 4.67  | 283sh321         | 387         | 193(100),179(3),161(8),133(4)                               | Caffeic acid methyl ester dimer <sup>4</sup>                    | nd          | 0.01±0.01   | 0.101±0.002    |
| 3                               | 5.91  | 291sh314         | 353         | 191(20), 179(61), 173(100). 135(12)                         | 5-O-Caffeoylquinic acid <sup>5</sup>                            | 0.86±0.03   | 0.03±0.03   | 0.047±0.002    |
| 4                               | 8.96  | 299sh321         | 179         | 135(100)                                                    | Caffeic acid <sup>4</sup>                                       | 0.25±0.002  | 1.01±0.03   | 1.23±0.07      |
| 5                               | 12.67 | 284sh326         | 623         | 461(100), 285(84)                                           | Luteolin- <i>O</i> -hexosyl- <i>O</i> -glucuronide <sup>3</sup> | 0.57±0.01   | 0.07±0.002  | 0.07±0.002     |
| 6                               | 13.89 | 285sh331         | 595         | 287(100)                                                    | Eriodictyol-7- <i>O</i> -rutinoside <sup>5</sup>                | 1.84±0.03   | 3.99±0.11   | 4.25±0.09      |
| 7                               | 16.87 | 347              | 593         | 285(100)                                                    | Luteolin- <i>O</i> -rutinoside <sup>3</sup>                     | 9.29±0.06   | 1.26±0.03   | 2.34±0.11      |
| 8                               | 17.91 | 347              | 461         | 285(100)                                                    | Luteolin- <i>O</i> -glucuronide <sup>3</sup>                    | 15.29±0.05  | 3.56±0.09   | 4.91±0.18      |
| 9                               | 19.55 | 285sh338         | 717         | 519(100), 339, 321                                          | Salvianolic acid A <sup>7</sup>                                 | 2.197±0.005 | 1.22±0.04   | 1.19±0.03      |
| 10                              | 20.62 | 331              | 359         | 197(87), 179(91), 161(100), 135(48)                         | Rosmarinic acid <sup>7</sup>                                    | 31.27±0.35  | 19.61±0.49  | 32.08±1.18     |
| 11                              | 22.58 | 282sh326         | 719         | 539(12),521(9), 359(100), 197(9), 179(12), 161(51),135(5)   | Sagerinic acid <sup>7</sup>                                     | 3.29±0.14   | 2.24±0.08   | 2.68±0.01      |
| 12                              | 24.34 | 299sh327         | 537         | 493(100),359(35),313(4),295(2)                              | Lithospermic acid A <sup>7</sup>                                | 5.89±0.41   | 2.83±1.3    | 5.57±0.02      |
| 13                              | 27.08 | 289sh324         | 533         | 489 (100), 285 (51)                                         | Luteolin-7- <i>O</i> -malonylglucoside <sup>3</sup>             | 2.19±0.11   | 0.39±0.08   | 0.58±0.04      |
| 14                              | 28.96 | 298sh325         | 537         | 493(70), 359(15), 313(30), 295(100),269(25),197(16),179(72) | Lithospermic acid A isomer <sup>7</sup>                         | 3.64±0.22   | 2.35±0.01   | 2.87±0.05      |
| <b>Total Phenolic Acids</b>     |       |                  |             |                                                             |                                                                 | 48.01±0.41  | 29.52±0.78  | 45.77±1.24     |
| <b>Total Flavonoids</b>         |       |                  |             |                                                             |                                                                 | 29.19±0.1   | 9.28±0.16   | 12.15±0.34     |
| <b>Total Phenolic Compounds</b> |       |                  |             |                                                             |                                                                 | 77.2±0.51   | 38.79±0.62  | 57.92±1.59     |

Rt: Retention time (min),  $\lambda_{\max}$ : wavelengths of maximum absorption in the visible region (nm); MS<sup>2</sup>: second stage of mass spectrometry. Superscript numbers indicate the compound standard used for the quantification: (1) 4-Hydroxybenzoic acid; (2) Apigenin-6-*C*-glucoside; (3) Apigenin-7-*O*-glucoside; (4) Caffeic acid; (5) Chlorogenic acid; (6) Naringenin; (7) Rosmarinic acid. Content values expressed as mean ± SD (n= 3); nd: not detecte
